# Supplementary material for: Trends in Use and Cost of Second-Generation Antipsychotics Among Children and Teens in Indiana Medicaid, 2004–2012
Source: Atypon-hosted journal article supplement (doi:10.1176/appi.ps.201500061), 2016-05-16

**Figure 1. FFS Second Generation Antipsychotic (SGA/AAP) Utilization Rates Increase Steadily until 2008.**

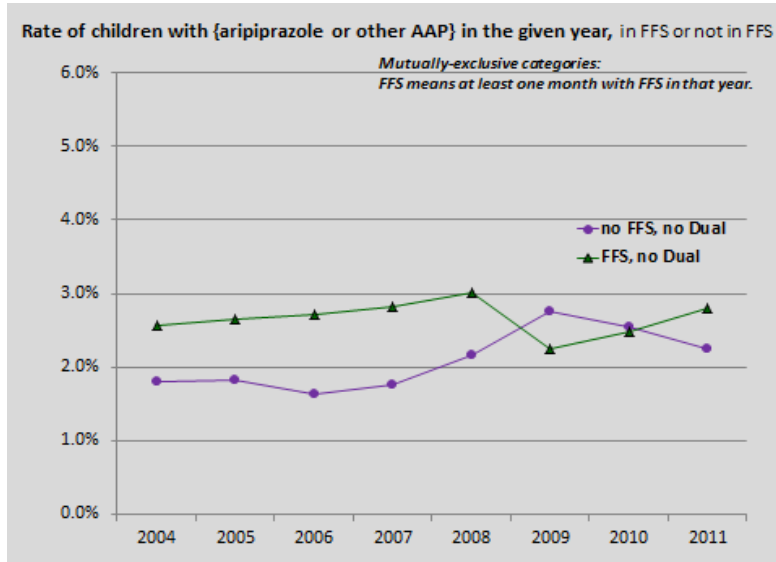

**Figure 2. Increasing Monthly Second Generation Antipsychotic/Aripiprazole Utilization until April 2009**

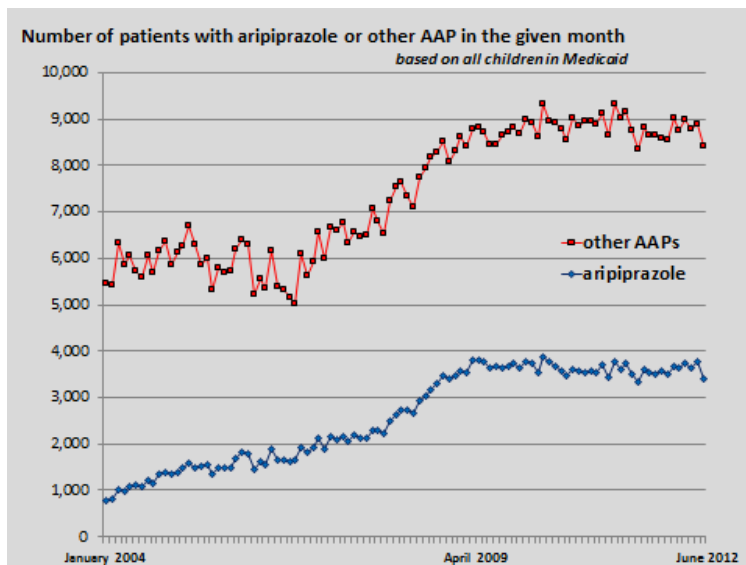

**Figure 3. % Second Generation Antipsychotic Utilization by Month, Pre, Post, and During IN Medicaid Program Changes (75 time points starting Oct 2005-Dec 2011).**

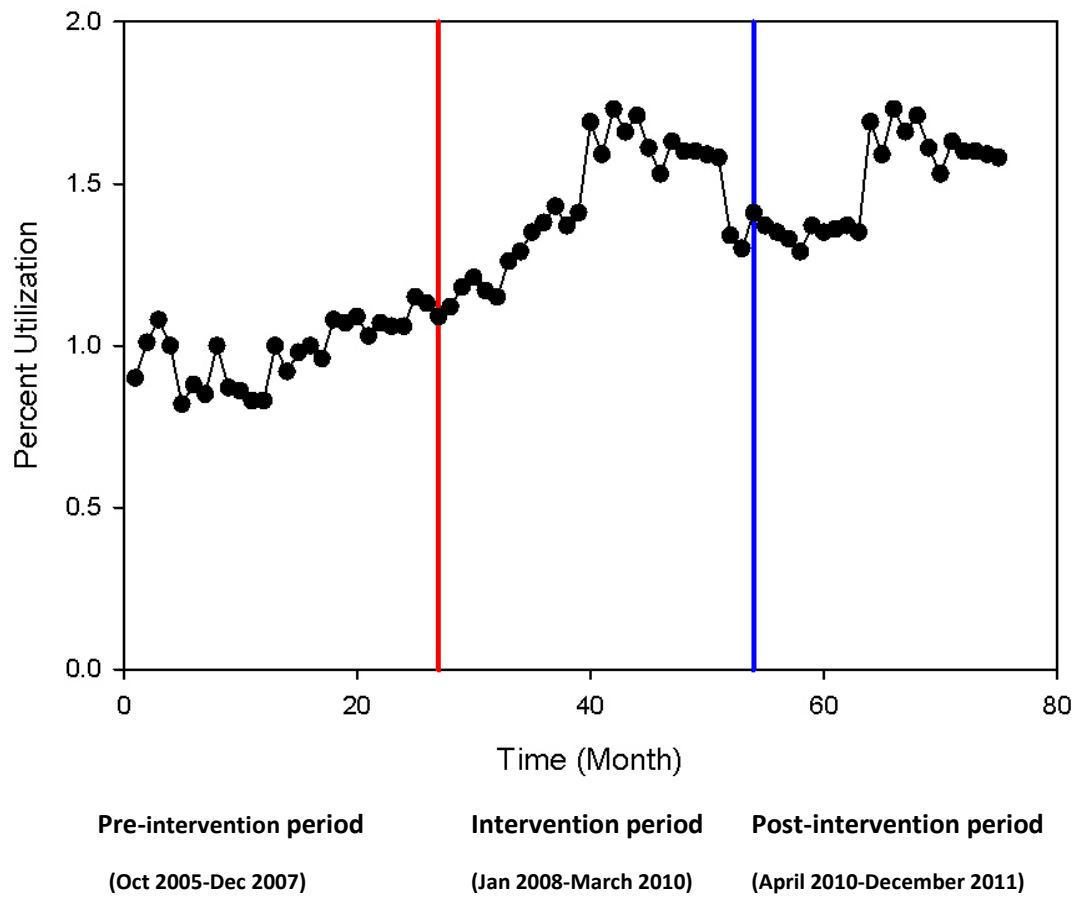

Figure 4. Monthly Cost of Second Generation Antipsychotics (SGAs)(\$s Per Member Per Month)

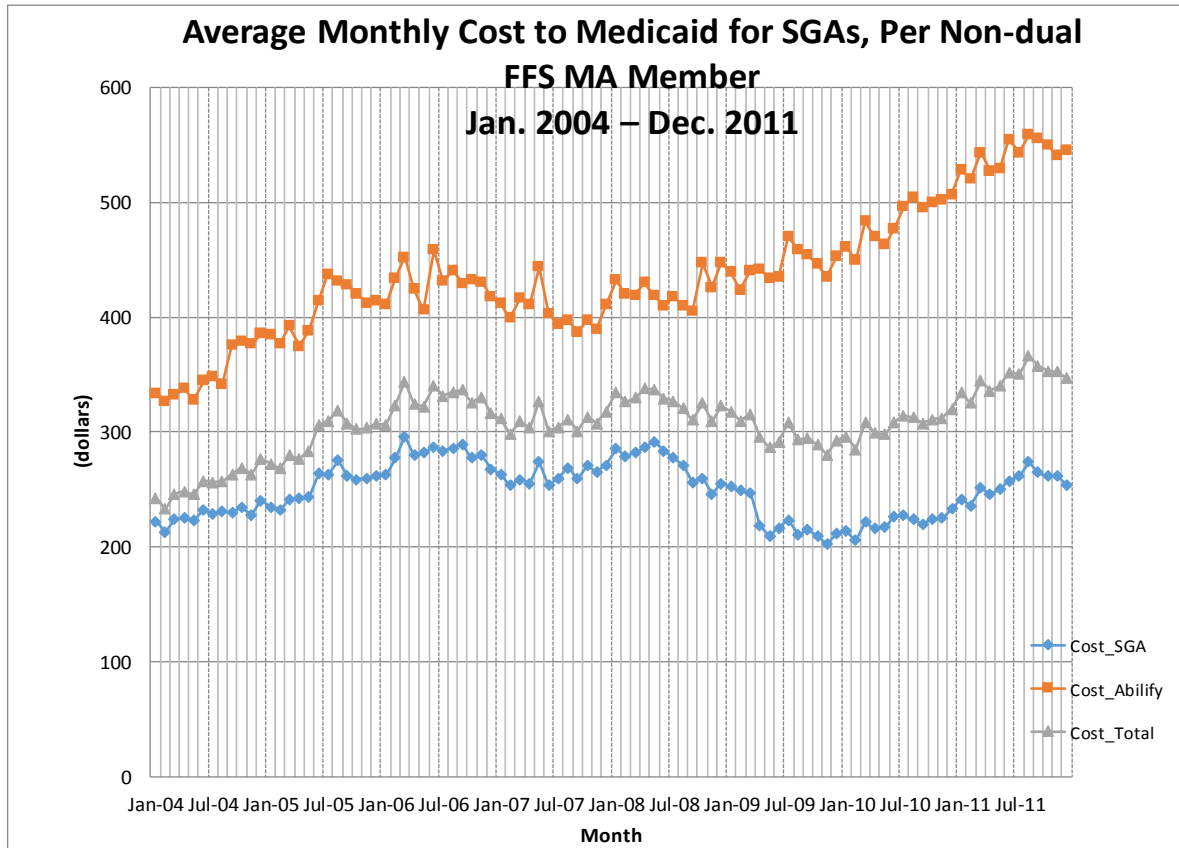

Supplement: appi.ps.201500061.ds001.pdf [file appi.ps.201500061.ds001.pdf]
